# Supplementary material for: Thermal post-synthetic modification of Al-MIL-53–COOH: systematic investigation of the decarboxylation and condensation reaction
Source: Royal Society of Chemistry journal article supplement (doi:10.1039/c2ce06649a), 2012-01-01
Supplement: c2ce06649a.pdf [file c2ce06649a.pdf]

# Supporting Information

## Thermal post-synthetic modification of Al-MIL-53-COOH: systematic investigation of the decarboxylation and condensation reaction

Nele Reimer<sup>a</sup>, Barbara Gil<sup>b</sup>, Bartosz Marszalek<sup>b</sup>, and Norbert Stock<sup>a</sup>

<sup>a</sup>*Institut für Anorganische Chemie, Christian-Albrechts-Universität, Germany;* <sup>b</sup>*Faculty of Chemistry, Jagiellonian University, Poland*

|                                                                                                                          |      |
|--------------------------------------------------------------------------------------------------------------------------|------|
| Fig. S1: Anton Paar Synthos 3000 microwave oven and reaction vials.....                                                  | p. 1 |
| Fig. S2: Structural transformation of Al-MIL-53-COOH(DMF) into<br>Al-MIL-53-COOH under exposure to the atmosphere.....   | p. 2 |
| Fig. S3: Pawley-Fit of Al-MIL-53-COOH.....                                                                               | p. 2 |
| Fig. S4: Pawley-Fit of Al-MIL-53-COOH(DMF).....                                                                          | p. 3 |
| Fig. S5: Powder patterns of water treated and in air dried samples<br>of Al-MIL-53-COOH.....                             | p. 3 |
| Fig S6: <sup>13</sup> C CP-MAS NMR spectra of the at 410 °C activated sample of<br>Al-MIL-53-COOH.....                   | p. 4 |
| Fig. S7: Powder patterns of thermal activated samples of Al-MIL-53-COOH<br>at different temperatures.....                | p. 4 |
| Fig. S8: Powder patterns of thermal activated samples of Al-MIL-53-COOH<br>at 410 °C for different activation times..... | p. 5 |

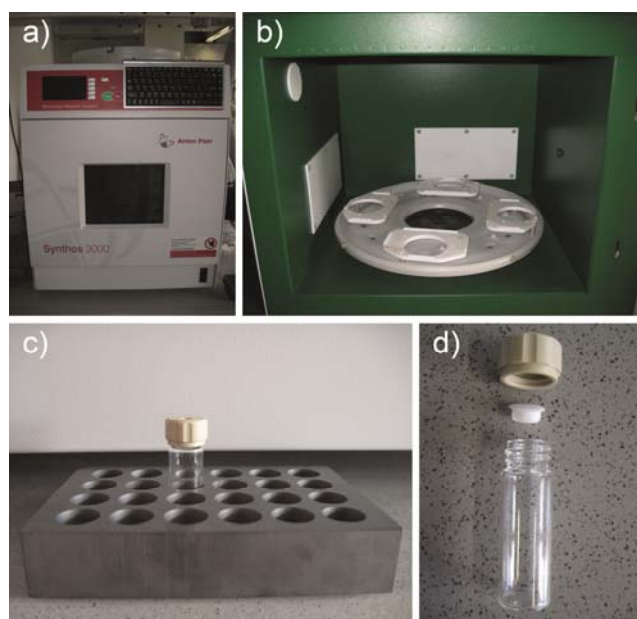

**Fig. S1** a) Anton Paar Synthos 3000 microwave oven, b) 96-position rotor, c) silicon carbide reaction block with 4 x 6 array, d) glass vial with Teflon seal and screw cap.

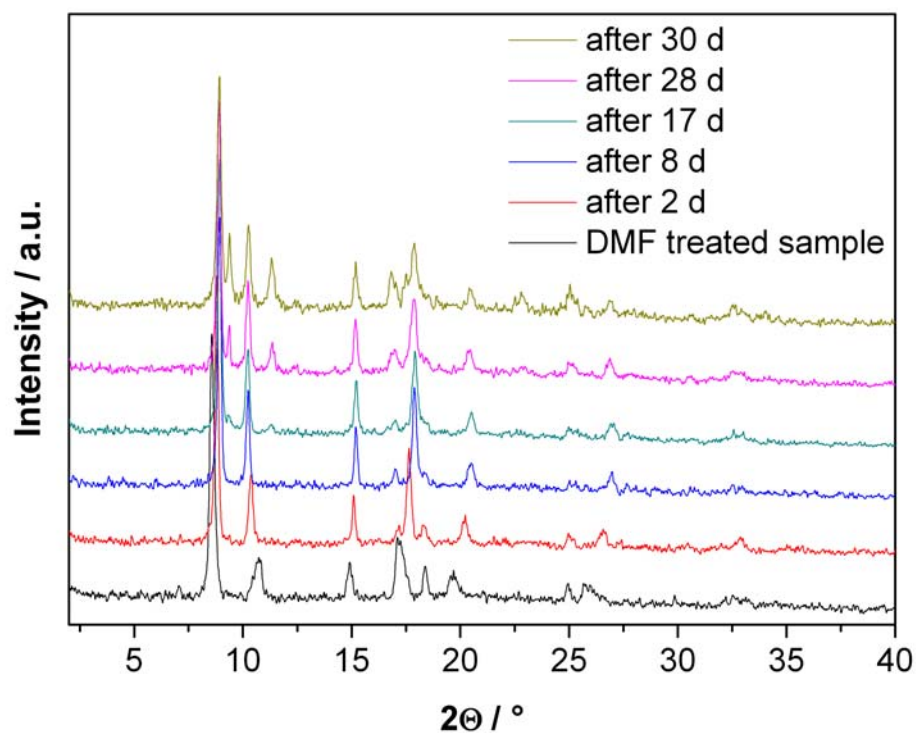

**Fig. S2** Powder patterns of Al-MIL-53-COOH(DMF) showing the structural change towards Al-MIL-53-COOH after at least 8 days under exposure to the atmosphere.

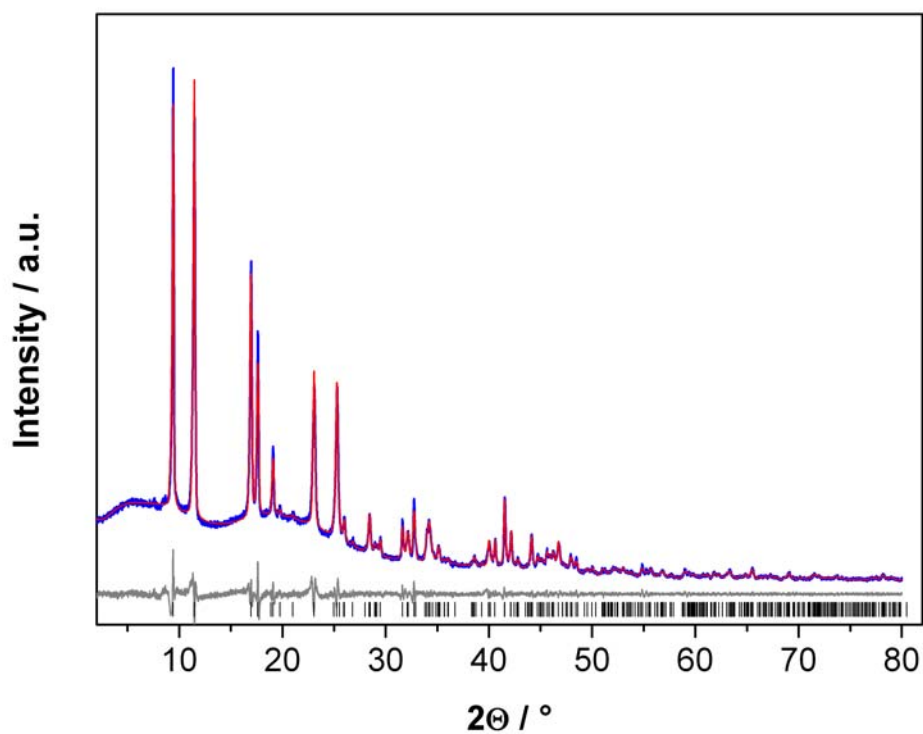

**Fig. S3** Pawley-Fit of Al-MIL-53-COOH.

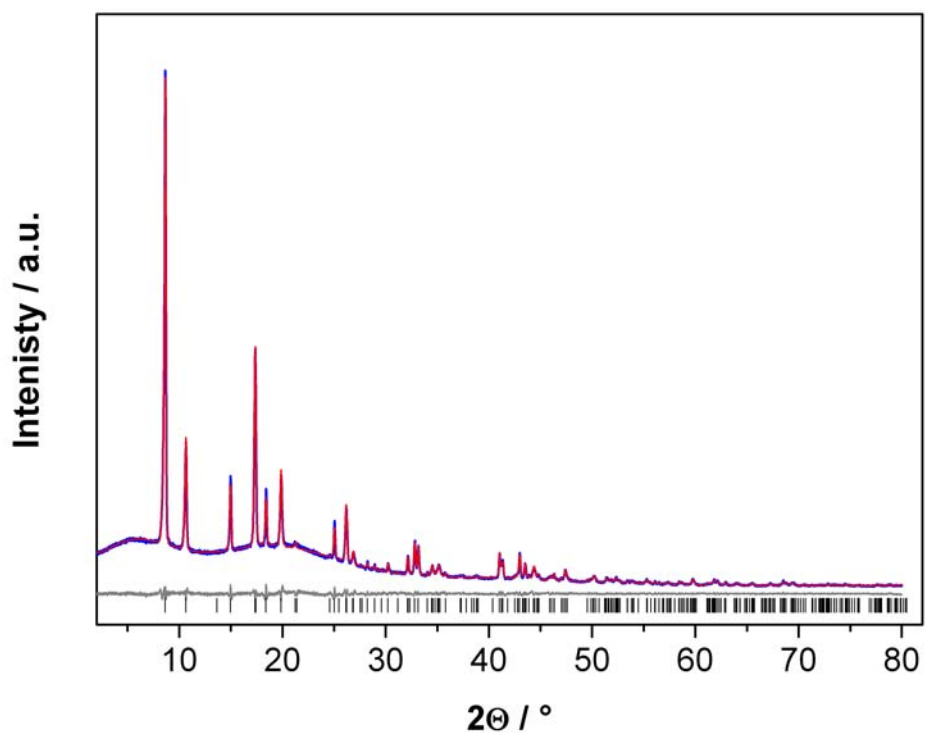

**Fig. S4** Pawley-Fit of Al-MIL-53-COOH(DMF).

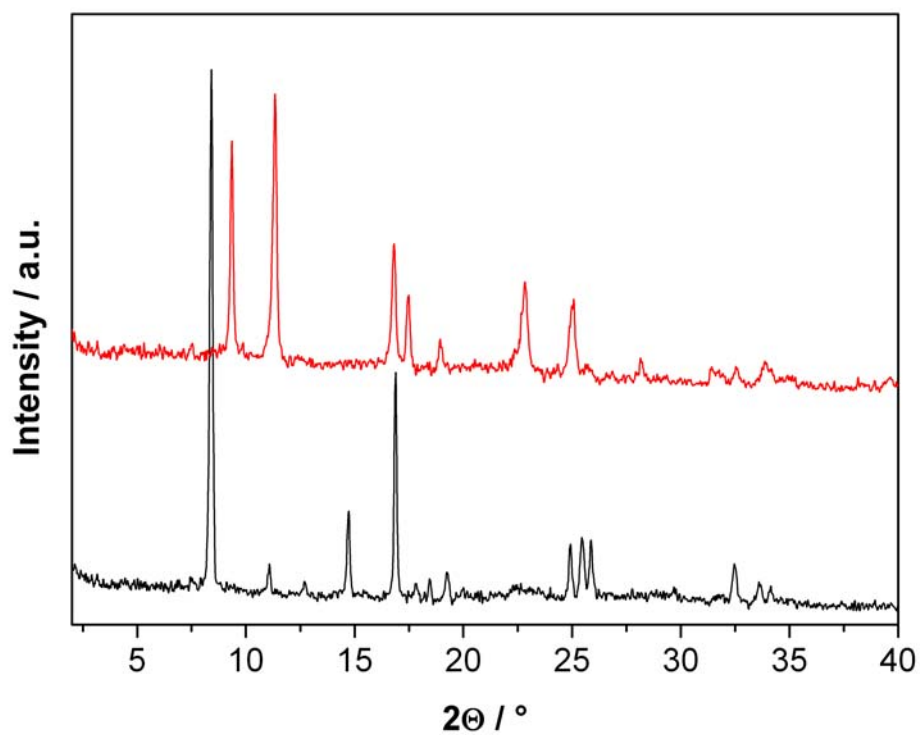

**Fig. S5** Powder patterns of the water treated sample of Al-MIL-53-COOH (black) and the in air dried product (red).

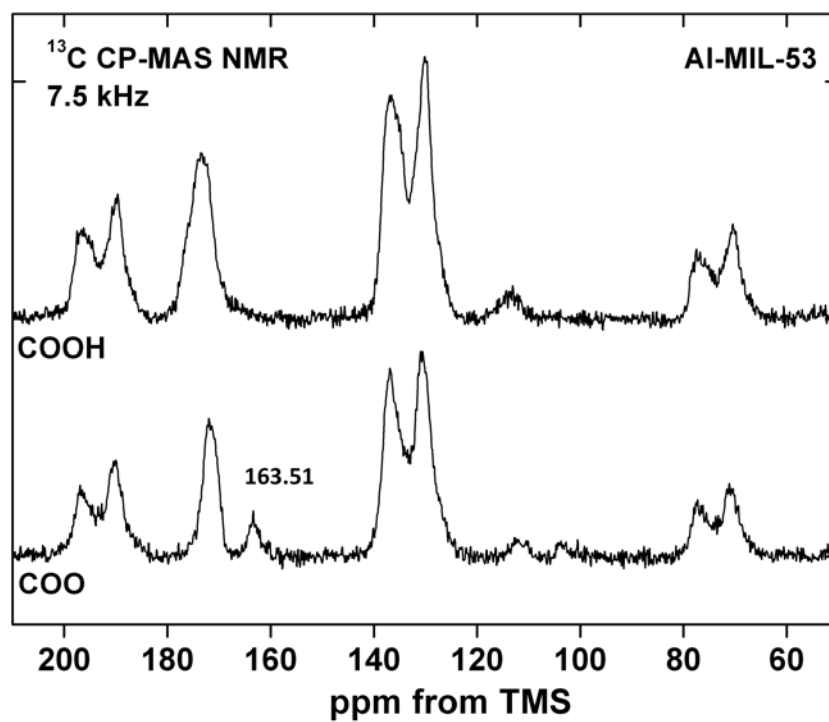

**Fig. S6** <sup>13</sup>C CP-MAS NMR spectra of the activated sample of Al-MIL-53-COOH (410 °C) (bottom) and the non-activated one (top).

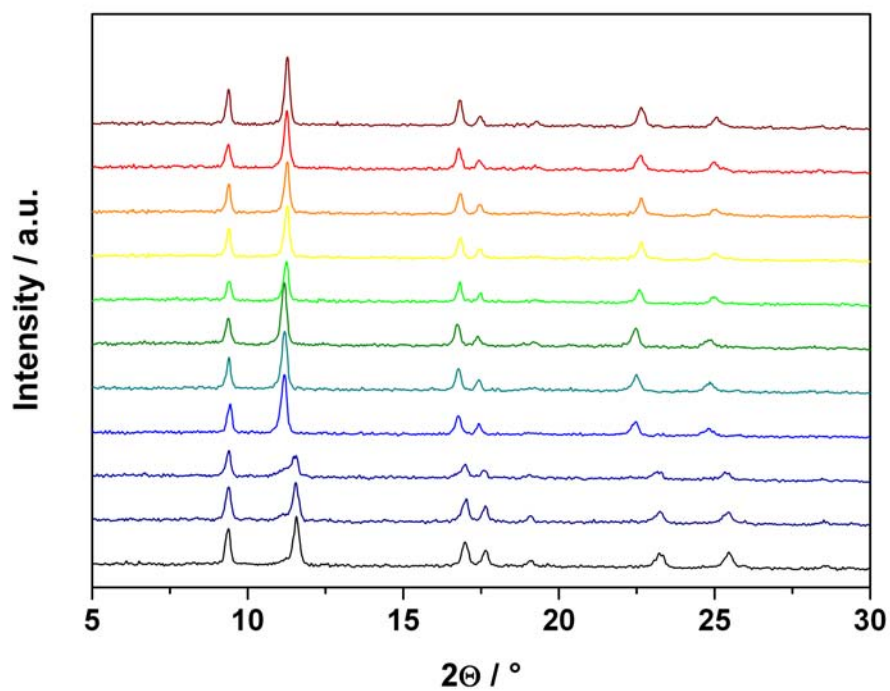

**Fig. S7** Powder patterns of the thermal activated samples of Al-MIL-53-COOH for 12 h in the range of 210 °C-410 °C in 20 °C steps

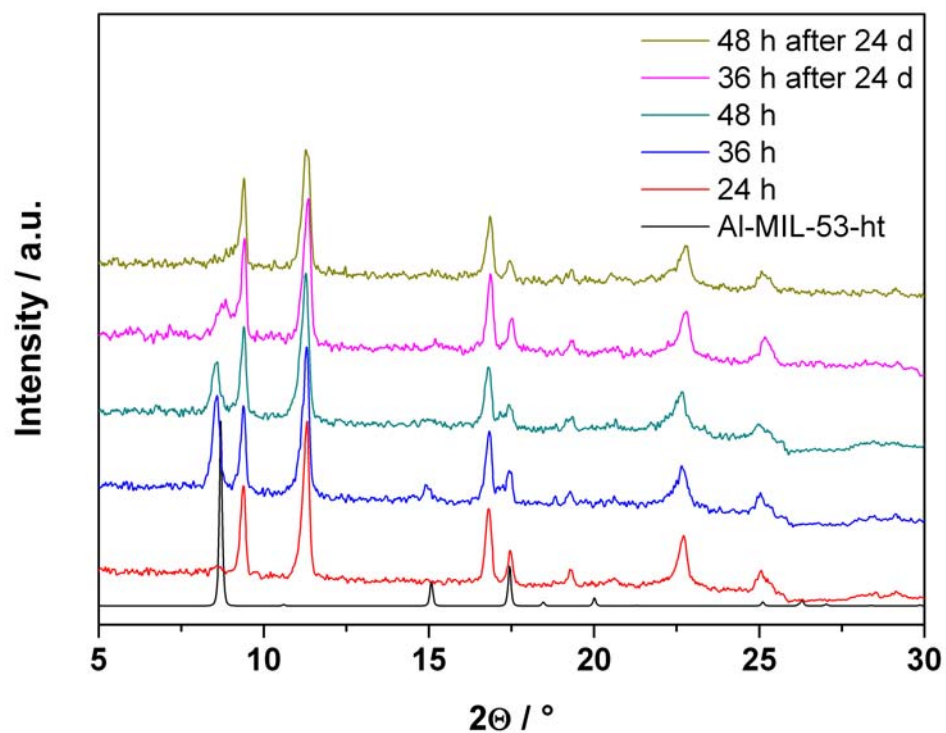

**Fig. S8** Powder patterns of the thermal activated samples of Al-MIL-53-COOH at 410 °C for 24, 36 and 48 h compared with the theoretical powder pattern of Al-MIL-53.
